# Supplementary material for: The MedXFit-study – CrossFit as a workplace health intervention: a one-year, prospective, controlled, longitudinal, intervention study
Source: Frontiers journal article supplement (doi:10.3389/fpubh.2024.1304721), 2024-02-21
Supplement: Data_Sheet_2.PDF [file Data_Sheet_2.PDF]

**Table S2** Sample training sessions: Week 27 to 52

Sample training sessions for the training weeks 27 – 52 are provided in the table below.

The intervention group trained on 2 days per week. They self-selected the training day (Monday to Friday) but were encouraged to have at least 24 hours of rest between training sessions. Every training week was structured around a particular exercise - the main emphasis of the week. Nevertheless, training sessions differed daily. The training was done in groups (maximum 10 participants) under supervision of a certified CrossFit coach (CrossFit Level 1 and CrossFit Level 2). Although everyone followed the same program, the coach scaled volume, intensity, and movements according to the participants individual, physical condition.

Each training session lasted 60 minutes. The training session started with 5 - 10 minutes of introduction and warm up. Mobility was done afterwards for another 5 – 10 minutes, including the areas that are involved in the skill and strength part of the session. The skill and strength part lasted 5 – 30 minutes. After the skill and strength part, a high-intensity workout was performed for 5 – 30 minutes. Every session ended with 5 – 10 minutes of mobility and stretching.

Further explanations:

- E(x)MOM (y)= Every minute on the minute. Complete the prescribed repetitions per exercise in the given intervals and rest during the remaining time. When the given intervals differ from 1 minute, the x determines the length of intervals (e.g., E3MOM = every 3 minutes). When different movements are prescribed for the intervals, the sequence is written as 1) exercise 1, 2) exercise 2, etc. (y) determines the overall length.
- AMRAP = As many repetitions as possible are done in the given time span.
- For time = The prescribed workout is done as fast as possible.
- Tabata = 8 consecutive sets of 20sec work followed by 10sec rest. When different movements are prescribed for the intervals, the sequence is written as 1) exercise 1, 2) exercise 2, etc..
- (x)-(x)-(x)-(x) repetitions = Complete x repetitions of every exercise as fast as possible. 21 – 15 – 9 Pull ups, Thruster = Complete 21 pull ups, 21 thruster, 15 pull ups, 15 thruster, 9 pull ups and 9 thruster as fast as possible.
- Technique = Technique training of complex movements. Intensity was kept low.

|         | Main emphasis            | Warm-up                                                                                | Mobility          | Skill and strength                                                                                                         | “Workout of the day”                                                                                                     | Cool-down             |
|---------|--------------------------|----------------------------------------------------------------------------------------|-------------------|----------------------------------------------------------------------------------------------------------------------------|--------------------------------------------------------------------------------------------------------------------------|-----------------------|
| Week 27 | Dumbbell clean and press | 3 Rounds<br>10 Good morning<br>10 Squat<br>10 Slow mountain climber<br>10 Dumbbell row | Ankle, hip, wrist | E3MOM 21<br>3-5 Rounds dumbbell complex<br>1 Dumbbell power clean + 2 Dumbbell front rack squat +<br>3 Dumbbell push press | 10min AMRAP<br>2 Slamball thruster<br>2 Sit up<br>4 Slamball thruster<br>4 Sit up<br><i>add 2 repetitions each round</i> | Mobility / stretching |

|         |                  |                                                                                                                        |                                 |                                                                                                                                                                                              |                                                                                                                                                                                                                                                                    |                       |
|---------|------------------|------------------------------------------------------------------------------------------------------------------------|---------------------------------|----------------------------------------------------------------------------------------------------------------------------------------------------------------------------------------------|--------------------------------------------------------------------------------------------------------------------------------------------------------------------------------------------------------------------------------------------------------------------|-----------------------|
| Week 28 | Rowing ergometer | 20m Walking lunge<br>15 Sit up<br>20m Jog<br>15 Squat<br>20m Walking lunge<br>15 Push up<br>20m Jog<br>15 Good morning | Ankle, shoulder, thoracic spine | (1) E4MOM 20<br>20cal Row + 20 Swimmer + 20 Sit up<br><br>(2) Tabata<br>Wall angel<br>Hollow hold                                                                                            | 9min AMRAP<br>20 High knee<br>50m Run<br>10 Burpee<br>50m Run<br>15 Jumping jack                                                                                                                                                                                   | Mobility / stretching |
| Week 29 | Pull up          | 5 rounds Slamball complex<br>5 Deadlift<br>5 SlamBall clean<br>5 Front squat<br>5 Press<br>5 Slamball                  | Shoulder, thoracic spine        | (1) EMOM 21<br>1) 5-10 Pull Up / jumping pull up / Australian pull up<br>2) 5-10 Push up<br>3) 5-10 Split squat<br><br>(2) Tabata<br>1) Side plank pulses right<br>2) Side plank pulses left | For time<br>10 Slamball thruster<br>15 Burpee<br>20 Slamball thruster<br>15 Burpee<br>30 Slamball thruster<br>15 Burpee<br>40 Slamball thruster<br>15 Burpee<br>50 Slamball thruster<br>15 Burpee<br>60 Slamball thruster<br>15 Burpee<br><br>Time cap: 18 minutes | Mobility / stretching |
| Week 30 | Dumbbell snatch  | 5min Loaded carries with dumbbells (farmers, waiters, suitcase, etc.)                                                  | Hip, shoulder                   | (1) Dumbbell snatch technique<br>Dumbbell deadlift<br>Dumbbell pull<br>Dumbbell high pull<br>Dumbbell muscle snatch<br>Dumbbell snatch<br><br>(2) Tabata<br>1) Seated leg lift<br>2) Swimmer | EMOM 10<br>5 Burpee + 20 Single under <i>then</i><br>50 goblet Squats                                                                                                                                                                                              | Mobility / stretching |

|         |                |                                                                                                           |                                        |                                                                                                                                                                                                                                                  |                                                                                                                                             |                          |
|---------|----------------|-----------------------------------------------------------------------------------------------------------|----------------------------------------|--------------------------------------------------------------------------------------------------------------------------------------------------------------------------------------------------------------------------------------------------|---------------------------------------------------------------------------------------------------------------------------------------------|--------------------------|
| Week 31 | Shoulder press | 2 rounds<br>10 Push up<br>10 Bird dog<br>10 Push up<br>10 Inchworm                                        | Hip,<br>shoulder,<br>thoracic<br>spine | (1) Barbell shoulder press technique<br><br>(2) 5 supersets<br>8 Barbell press<br>8 Scapular pull up / band pull apart<br><br>(3) Tabata<br>1) Side plank pulse right<br>2) Side plank pulse left                                                | 7min AMRAP<br>Burpee                                                                                                                        | Mobility /<br>stretching |
| Week 32 | Squat          | 10 World's greatest stretch<br>10 Air squat<br>10 Push up<br>10 Knee hug                                  | Hip,<br>ankle                          | (1) DB Goblet squat technique<br><br>(2) EMOM 18<br>1) 10 DB Front hold squat<br>2) 10 Australian pull up<br>3) 30sek Plank                                                                                                                      | For time<br>10 Burpee<br>50m Run<br>20 Sit up<br>50m Run<br>30 Lunge<br>50m Run<br>40 Air squat<br>50m Run                                  | Mobility /<br>stretching |
| Week 33 | Snatch         | 3-5 rounds Slamball complex<br>5 Deadlift<br>5 Slamball clean<br>5 Front squat<br>5 Slamball<br>5 Push up | Ankle,<br>hip,<br>shoulder             | (1) Snatch technique<br>Snatch grip deadlift<br>Snatch grip high pull<br>Snatch grip press behind the neck<br>Overhead squat<br>Drop snatch<br>Snatch from hip height<br><br>(2) Tabata<br>1) Side plank pulse right<br>2) Side plank pulse left | 3 Rounds for max repetitions<br>1 Min Wall ball shot<br>1 Min Slamball<br>1 Min Box jump<br>1 Min Push up<br>1 Min Max cal row<br>1Min Rest | Mobility /<br>stretching |
| Week 34 | Pull ups       | 3 Round<br>5 Scapular Pull up<br>5 Scapular Push up<br>10 Overhead squat                                  | Shoulder                               | (1) EMOM20 (30sec work/30sec rest)<br>1) Jumping pull up<br>2) Slamball thruster<br>3) TRX row<br>4) Barbell thruster<br><br>(2) Tabata<br>1) Hollow hold<br>2) Superman                                                                         | 12min AMRAP<br>2 Lunge<br>2 Russian twist (2-count)<br>4 Lunge<br>4 Russian twist (2-count)<br>*add 2 repetitions each round                | Mobility /<br>stretching |

|         |                                |                                                                                                                                                                                |                                        |                                                                                                                                                                                                       |                                                                                   |                          |
|---------|--------------------------------|--------------------------------------------------------------------------------------------------------------------------------------------------------------------------------|----------------------------------------|-------------------------------------------------------------------------------------------------------------------------------------------------------------------------------------------------------|-----------------------------------------------------------------------------------|--------------------------|
| Week 35 | Snatch                         | 2 rounds<br>10 Push Ups<br>10 Kettlebell Deadlift<br>15m Suitcase Carry<br>10 Kettlebell Front hold lunge<br>15m Front hold Carry<br>10 Kettlebell Press<br>15m Overhead carry | Hip,<br>shoulder                       | (1) Snatch technique<br>Muscle Snatch<br>Overhead squat<br>Behind neck snatch grip press<br>Behind neck snatch grip sots press<br>Drop snatch<br><br>(2) Tabata<br>1) Seated leg lift<br>2) Tuck hold | For time<br>21-15-9<br>One arm dumbbell overhead<br>squat<br>Burpee box jump over | Mobility /<br>stretching |
| Week 36 | Deadlift                       | 200m run<br>8 Push up<br>16 Squat<br>22 Dead bug<br>16 Squat<br>8 Push up<br>200m run                                                                                          | Ankle,<br>hip,<br>shoulder             | (1) Deadlift 5 RM<br><br>(2) Sumo deadlift high pull 5 RM                                                                                                                                             | For time<br>3-9-15-21-15-9-3<br>Deadlift (Rx 93/ 66 kg)<br>Box jump (24/20 inch)  | Mobility /<br>stretching |
| Week 37 | Russian<br>Kettlebell<br>Swing | 3 Rounds<br>10 Deadlift<br>10 Row<br>10 Lunge<br>10 Goblet squat<br>10 Push up                                                                                                 | Hip                                    | (1) Kettlebell swing technique<br><br>(2) Tabata<br>1) Side plank left<br>2) Side plank right                                                                                                         | For time<br>10-9-8-7-6-5-4-3-2-1<br>Burpee box jump<br>Kettlebell swing           | Mobility /<br>stretching |
| Week 38 | Overhead<br>stability          | 2 Rounds (each side)<br>1 Turkish get up<br>5 Windmill<br>5 Kneeling one-arm press<br>10 Row<br>10 Overhead lunge                                                              | Hip,<br>shoulder,<br>thoracic<br>spine | E3MOM27<br>5-10 Scapula pull up + 5 Overhead squat<br>2sec:2sec:2sec:2sec (down: hold: up: hold)                                                                                                      | 10min AMRAP<br>10 Kettlebell high pull<br>5 Burpee                                | Mobility /<br>stretching |
| Week 39 | Rowing erg                     | 2 Rounds<br>5 Swimmer<br>10 Wall angel<br>15 Sit up<br>20 Air squat                                                                                                            | Hip,<br>shoulder,<br>thoracic<br>spine | (1) EMOM 24<br>1) 7cal Row<br>2) 15 Sit up<br>3) 10 Thruster<br>4) 10 Ring row<br><br>(2) Tabata<br>Hollow hold                                                                                       | For time<br>20cal Row<br><i>then</i><br>3 Rounds<br>20 Deadlift<br>30 Box jump    | Mobility /<br>stretching |

|         |                   |                                                                                                                                                                          |                               |                                                                                                                                                |                                                                                                               |                       |
|---------|-------------------|--------------------------------------------------------------------------------------------------------------------------------------------------------------------------|-------------------------------|------------------------------------------------------------------------------------------------------------------------------------------------|---------------------------------------------------------------------------------------------------------------|-----------------------|
| Week 40 | Dumbbell Snatch   | 3 Rounds (with kettlebell)<br>10 Deadlift<br>10 Goblet squat<br>10 Swing<br>1 Turkish get up each side                                                                   | Hip, shoulder, thoracic spine | (1) Dumbbell snatch technique<br><br>(2) Hanging knee raises technique                                                                         | 20min AMRAP<br>8 Hanging knee raise<br>10 Dumbbell snatch<br>14ca. Row                                        | Mobility / stretching |
| Week 41 | Pull up, Thruster | 2 Rounds<br>10 Snatch grip deadlift<br>10 Snatch grip high pull<br>10 Snatch grip press<br>10 Overhead lunge<br>10 Overhead squats                                       | Ankle, hip, shoulder, wrist   | (1) Muscle clean + push press technique<br><br>(2) E2MOM 16<br>Complex 1 Muscle clean, 2 front squat, 3 push press<br><br>(3) Tabata<br>Sit up | "FRAN"<br>21-15-9<br>PullUps<br>Thruster                                                                      | Mobility / stretching |
| Week 42 | Deadlift          | 5 Rounds<br>10 Wall Facing quat<br>10 Wallball shot                                                                                                                      | Hip, upper back               | (1) E3MOM 24<br>5 Deadlift (increase weight each round)<br>10 Ring row<br><br>(2) Tabata<br>Hollow hold                                        | For time<br>21-15-9<br>Deadlift 70% of 5 RM<br>Dumbbell thruster                                              | Mobility / stretching |
| Week 43 | Back Squat        | 5min Loaded carries with dumbbells (farmers, waiters, suitcase, etc.)<br><br>3 Rounds<br>1 Turkish get up (each side; 10sec up, 10sec down)<br>10 Slow wall facing squat | Ankle, hip                    | (1) Back squat technique<br><br>(2) E3MOM 21<br>5 Back squat + 10 dumbbell row                                                                 | For time<br>5 Rounds<br>10 Deadlift<br>10 Burpee                                                              | Mobility / stretching |
| Week 44 | Overhead press    | 3 Rounds<br>200m Run<br>10 Burpee<br>15m Inch worm                                                                                                                       | Shoulder                      | Overhead press<br>Build up to 5 RM                                                                                                             | For time<br>5 Rounds<br>10 Shoulder to overhead (100% of strict press 5RM)<br>10 Toes to bar / knees to elbow | Mobility / stretching |
| Week 45 | Pull up           | 3 Rounds<br>10 Walk out<br>10 Sit up<br>10 Burpee                                                                                                                        | Shoulder                      | (1) EMOM 10<br>3 Pull up<br><br>(1) Tabata<br>1) Hang from bar in hollow position<br>2) Hang from bar in arched position                       | AMRAP 20<br>20cal bike<br>15 Push up<br>10 Dumbbell snatch<br>5 Sit up                                        | Mobility / stretching |

|         |                          |                                                                                                                              |                                          |                                                                                                                           |                                                                                                            |                          |
|---------|--------------------------|------------------------------------------------------------------------------------------------------------------------------|------------------------------------------|---------------------------------------------------------------------------------------------------------------------------|------------------------------------------------------------------------------------------------------------|--------------------------|
| Week 46 | Front squat              | 3 Rounds Kettlebell complex<br>10 Deadlift<br>10 Goblet squat<br>10 Swing                                                    | Ankle,<br>hip,<br>shoulder,<br>wrist     | E2MOM 18<br>5 Paused front squat (3sec) + 10 ring row                                                                     | AMRAP 20<br>15 Box jump<br>12 Shoulder to overhead<br>9 Toes to bar                                        | Mobility /<br>stretching |
| Week 47 | Handstand                | 3 Rounds<br>10 Walkout<br>8 Sit up<br>6 Lunge<br>4 Hollow rock<br>2 burpee                                                   | Shoulder,<br>thoracic<br>spine           | Handstand technique                                                                                                       | For time<br>100 Squat<br>80 Lunge<br>60 Jumping squat<br>40 Jumping lunge<br>20 Pistol squat               | Mobility /<br>stretching |
| Week 48 | Rowing<br>ergometer      | 3 Rounds barbell complex<br>15 Deadlift<br>15 Row<br>10 Press<br>15 Squat                                                    | Shoulder,<br>hip                         | EMOM 20<br>1) 10 Shoulder press<br>2) 15 Kettlebell swing<br>3) 15 Sit up<br>4) 15 Barbell squat<br>5) 30sec Single under | For Time<br>500m Row<br><i>Rest 1min</i><br>500m Row<br><i>Rest 1min</i><br>500m Row                       | Mobility /<br>stretching |
| Week 49 | Back squat               | 3 Rounds<br>10 Air squat<br>10 Inch worm<br>10 Russian twist                                                                 | Ankle,<br>hip                            | E3MOM 15<br>10 Back squat                                                                                                 | For Time<br>60cal Row<br>40 Wallball shot<br>100 Single under                                              | Mobility /<br>stretching |
| Week 50 | Push press,<br>push jerk | 3 Rounds<br>10 Dumbbell deadlift<br>10 Dumbbell row<br>10 Dumbbell press<br>20m Dumbbell overhead carry                      | Shoulder,<br>thoracic<br>spine,<br>wrist | (1) Push press, push jerk technique<br><br>(2) E2MOM 14<br>3 Push Press (hold overhead position for 5sec)                 | For time<br>1000m Row<br>50 Thruster<br>50 Kettlebell Swing                                                | Mobility /<br>stretching |
| Week 51 | Thruster                 | 2 Rounds<br>10 Clean grip deadlift<br>10 Clean grip highpull<br>10 Clean grip press<br>10 Front rack lunge<br>10 Front squat | Shoulder,<br>hip                         | E2MOM 20<br>5 Thruster (hold bottom position 3sec)                                                                        | AMRAP 20<br>250m Row<br>10 Thruster<br>10 Sit up<br>10 KB Swing                                            | Mobility /<br>stretching |
| Week 52 | Double under             | 2 Rounds<br>15cal Row<br>15 Jumping jack<br>5 Inch worms                                                                     | Ankle,<br>wrist                          | Double under technique                                                                                                    | For Time<br>100-80-60-40-20<br>Air squat<br>Mountain climber<br>Double under<br><i>every 2min 5 burpee</i> | Mobility /<br>stretching |
